# Supplementary material for: PXCG-1 and PXCG-2: two reference materials for gypsum U–Th dating
Source: Royal Society of Chemistry journal article supplement (doi:10.1039/d4ja00067f), 2024-01-01
Supplement: d4ja00067f1.xlsx [file d4ja00067f1.xlsx]

## Sheet: Figure S1
Figure S1. The Raman spectrum results of 3 gypsum crystals.

## Sheet: Table S1
Table S1. The homogeneity test for PXCG-1 gypsum RM at IGGCAS. The error is 2σ error.
Test	Sample	238U		232Th		230Th / 232Th		δ234U		230Th / 238U		230Th Age (ka)		230Th Age (ka BP)		δ234UInitial
Time	Number	(ng g-1)		(ng g-1)		(atomic x10-6)		(measured)		(activity)		(uncorrected)		(corrected)		(corrected)
	split3	1878.16	3.05106	1.57679	0.0317031	11127.3	224.944	232.836	1.88452	0.574139	0.00152428	66.7744	0.281247	66.6759	0.281719	281.098	2.28609
	split8	1883.63	2.87627	1.39645	0.0280886	12520.6	253.223	230.699	1.73778	0.570483	0.00148532	66.3676	0.269351	66.2721	0.269736	278.201	2.10627
	split12	1888.94	3.03098	1.40152	0.0281901	12564.6	253.945	229.997	1.80903	0.572949	0.00146008	66.8101	0.270398	66.7145	0.270779	277.701	2.19452
	split15	1862.93	3.00025	1.34558	0.0270867	12935	261.821	228.421	1.89649	0.574206	0.00152799	67.133	0.284627	67.0379	0.284961	276.049	2.30266
	split23	1805.58	3.17833	1.49674	0.0301115	11263.3	227.852	230.646	1.93385	0.573827	0.00158224	66.8973	0.292051	66.7991	0.292487	278.551	2.3468
1	split26	1812.69	3.07248	1.41926	0.0285634	11915.7	241.138	228.164	1.9341	0.573385	0.0015564	67.0235	0.28971	66.9266	0.2901	275.652	2.34752
	split38	1851.08	2.93656	1.5579	0.0313277	11092.7	224.319	228.859	1.86868	0.573769	0.00152775	67.0291	0.282969	66.9305	0.283445	276.496	2.26845
	split41	1838.65	2.81112	1.584	0.0318469	10846.8	219.301	230.406	1.7371	0.57431	0.00150622	66.9924	0.274209	66.8932	0.274732	278.335	2.10951
	split54	1871.16	2.76827	1.49652	0.0300896	11659.3	235.68	228.04	1.72535	0.573098	0.00146402	66.988	0.268582	66.8905	0.269041	275.475	2.09471
	split66	1827.63	2.7956	1.38175	0.0277987	12313.1	249.032	229.724	1.82452	0.57213	0.00147346	66.7025	0.272553	66.6065	0.272948	277.287	2.21261
	split73	1828.3	2.65184	1.37014	0.0275628	12519.1	253.119	230.44	1.8015	0.576604	0.00143698	67.352	0.268617	67.2562	0.269012	278.661	2.18873
	split3	1805.64	2.67073	1.45392	0.0292483	11741	237.079	230.835	1.84725	0.573387	0.00131182	66.8132	0.25237	66.7172	0.252803	278.715	2.23925
	split8	1827.38	2.65511	1.32189	0.0265972	13113	264.802	230.162	1.75722	0.575313	0.00129532	67.17	0.247456	67.0763	0.247809	278.184	2.13274
	split12	1840.28	2.61247	1.39892	0.0281309	12516.1	252.596	229.569	1.68102	0.577045	0.0012832	67.4912	0.243595	67.3964	0.244249	277.718	2.04256
	split15	1828.39	2.42842	1.31387	0.0264305	13186.9	266.13	230.812	1.67783	0.574726	0.00120225	67.0258	0.231226	66.9323	0.231608	278.856	2.03525
	split23	1876.04	2.62931	1.35165	0.0271948	13223.6	266.961	229.403	1.73342	0.577837	0.00125556	67.63	0.242769	67.5364	0.24344	277.626	2.10644
2	split26	1798.7	2.4806	1.31837	0.0265301	12855.3	259.921	230.624	1.7349	0.57147	0.00137141	66.5283	0.254455	66.4344	0.254808	278.238	2.10262
	split38	1843.65	2.6153	1.2866	0.0258931	13611	274.917	228.492	1.86264	0.576089	0.00128274	67.4255	0.251851	67.3325	0.252169	276.366	2.26146
	split41	1823.3	3.00483	1.22529	0.0246808	14108	285.472	230.063	1.74951	0.57502	0.00145803	67.1315	0.268684	67.0392	0.26895	278.035	2.12482
	split54	1803.41	2.66066	1.25725	0.0253045	13591.3	274.707	232.322	1.74874	0.574674	0.00136085	66.8987	0.254361	66.8058	0.254674	280.581	2.12159
	split66	1849.97	3.08822	1.25246	0.0252287	13927.7	281.978	231.282	1.83734	0.571892	0.00150481	66.5432	0.276358	66.4509	0.276617	279.045	2.22746
	split73	1828.96	2.95071	1.24922	0.0251574	13798.8	279.217	230.908	1.87981	0.571627	0.00145638	66.5309	0.271725	66.4384	0.271996	278.583	2.27799
	split3	1841.1	3.4855	1.22703	0.0247392	14200.4	288.386	234.493	2.21626	0.574001	0.00177058	66.6232	0.326717	66.5312	0.326902	282.982	2.68726
	split8	1856.91	2.21397	1.44038	0.0289563	12205.5	246.219	231.236	1.50056	0.574218	0.00117966	66.9124	0.220107	66.8172	0.220591	279.278	1.82064
	split12	1868.52	2.43438	0.945506	0.019079	18730.6	379.251	226.743	1.51608	0.574846	0.00121793	67.3678	0.228053	67.2802	0.228235	274.21	1.84195
	split15	1866.65	2.42287	0.930164	0.018769	19073.5	386.188	230.578	1.54775	0.576448	0.00122046	67.3163	0.228768	67.229	0.228942	278.807	1.88014
	split23	1825.2	2.38047	1.07606	0.021683	16110.7	325.71	232.72	1.49416	0.576068	0.0012071	67.0868	0.223649	66.997	0.223909	281.212	1.81423
3	split26	1845.06	2.42045	1.0445	0.0210573	16813.6	340.763	231.052	1.54593	0.577285	0.00141886	67.4109	0.255865	67.3217	0.256065	279.454	1.88065
	split38	1838.16	2.50285	1.24463	0.0250583	13983.8	282.739	231.433	1.69634	0.574271	0.00132457	66.9053	0.247563	66.813	0.247869	279.512	2.05806
	split41	1886.49	2.77935	1.38711	0.0279078	12890.6	260.49	232.873	1.61659	0.574863	0.0013765	66.8852	0.25085	66.7912	0.251211	281.234	1.96247
	split54	1808.71	2.49351	0.999113	0.0201515	17166.6	348.634	232.06	1.60128	0.575128	0.00157959	66.9909	0.278838	66.9021	0.279004	280.34	1.94698
	split66	1885.32	2.76933	1.05429	0.0212529	16958.2	343.094	234.58	1.67627	0.575158	0.00130073	66.7976	0.242515	66.7087	0.242718	283.23	2.03319
	split73	1851.52	2.53059	1.02899	0.0207424	17119.5	346.352	231.126	1.61108	0.577044	0.00126859	67.3669	0.237908	67.278	0.238117	279.509	1.95736
Note
δ234U = ([234U/238U]activity – 1) × 1000.
δ234Uinitial was calculated based on 230Th age (T), i.e., δ234Uinitial = δ234Umeasured × eλ234 × T.
Corrected 230Th ages assume the initial 230Th/232Th atomic ratio of (4.4 ±2.2) × 10-6. Those are the values for a material at secular equilibrium, with the bulk earth 232Th/238U value of 3.8. The errors are arbitrarily assumed to be 50%.
B.P. stands for “Before Present” where the “Present” is defined as the year 1950 A.D.

## Sheet: Table S2
Table S2. The homogeneity test for PXCG-2 gypsum RM at IGGCAS. The error is 2σ error.
Test	Sample	238U		232Th		230Th / 232Th		δ234U		230Th / 238U		230Th Age (ka)		230Th Age (ka BP)		δ234UInitial
Time	Number	(ng g-1)		(ng g-1)		(atomic x10-6)		(measured)		(activity)		(uncorrected)		(corrected)		(corrected)
	split3	1656.16	2.63244	3.41396	0.0685143	7861.47	158.699	61.5748	1.62187	0.982867	0.00265217	263.346	3.52698	263.202	3.52498	129.442	3.64465
	split8	1625.54	2.63329	3.26273	0.0654889	8087.65	163.177	62.6308	1.71159	0.984557	0.002571	263.833	3.53417	263.691	3.5322	131.843	3.83539
	split12	1635.07	2.89755	3.2504	0.0652626	8133.45	164.195	64.4957	1.83609	0.98064	0.00269261	257.428	3.50481	257.286	3.50287	133.337	4.01835
	split15	1631.41	2.5672	3.31599	0.066574	7910.69	159.631	58.9104	1.70969	0.975212	0.00250615	258.531	3.33076	258.388	3.3289	122.17	3.72681
	split23	1606.97	2.6821	3.18593	0.0639734	8151.95	164.59	60.6878	1.76829	0.980225	0.0026357	261.626	3.57199	261.484	3.57001	126.96	3.91432
1	split26	1611.1	2.82607	3.41832	0.0686576	7621.74	154.009	60.3089	1.81608	0.980796	0.00276852	262.712	3.76132	262.566	3.75907	126.553	4.04059
	split38	1524.75	2.36713	3.52291	0.0706984	6992.88	141.094	62.6653	1.7114	0.979924	0.00255192	258.883	3.35733	258.73	3.35527	130.082	3.76014
	split41	1693.67	2.62359	3.2056	0.0643311	8501.25	171.4	61.1004	1.639	0.975882	0.00242122	256.599	3.13754	256.461	3.13593	126.024	3.55986
	split54	1644.54	2.48457	3.15162	0.0632651	8413.06	169.834	60.5478	1.64664	0.977861	0.0025566	259.304	3.33977	259.165	3.33801	125.841	3.62192
	split66	1593.92	2.63468	3.44469	0.0691627	7471.09	150.868	62.0838	1.66924	0.979268	0.00266149	258.904	3.42162	258.757	3.41962	128.885	3.68187
	split73	1632.11	2.61513	3.2689	0.0656177	8053.55	162.481	62.3806	1.75332	0.978305	0.00252542	257.555	3.32711	257.413	3.32528	129.011	3.82294
	split3	1636.35	2.52522	3.47538	0.069744	7614.29	153.426	60.6589	1.64131	0.980818	0.00233436	262.296	3.24289	262.153	3.24111	127.139	3.63147
	split8	1677.38	2.40894	3.41312	0.068501	7937.96	160.027	62.1607	1.71209	0.979637	0.0023339	259.195	3.19521	259.055	3.19353	129.153	3.74294
	split12	1714.05	2.59247	3.47059	0.0696536	7977.59	160.754	58.3248	1.68665	0.979682	0.00230683	264.03	3.32538	263.89	3.3236	122.848	3.73481
	split15	1624.52	2.45601	3.23254	0.0648946	8126.77	163.856	63.6763	1.70013	0.980779	0.00236011	258.548	3.17819	258.41	3.17655	132.062	3.71951
	split23	1655.84	2.34571	3.41682	0.0685632	7850.44	158.177	62.282	1.73515	0.982496	0.00226633	262.057	3.24721	261.917	3.24546	130.454	3.82585
2	split26	1688.79	2.55078	3.43195	0.0688732	7942.97	160.093	61.7563	1.78673	0.979004	0.00235439	259.026	3.26793	258.887	3.26619	128.252	3.89443
	split38	1611.43	2.54689	3.80367	0.0763455	6858.24	138.281	63.7931	1.72309	0.981835	0.00243809	259.501	3.28649	259.351	3.28453	132.655	3.7883
	split41	1644.85	2.48751	3.28644	0.06596	8138.39	163.84	63.508	1.82297	0.986214	0.0021499	264.512	3.30151	264.374	3.29977	133.948	4.04228
	split54	1626.87	2.39262	3.42626	0.0687744	7674.03	154.824	63.3931	1.77367	0.980222	0.00245612	258.314	3.30528	258.172	3.30347	131.386	3.87481
	split66	1599.84	2.46309	3.28896	0.0660174	7820.73	157.679	59.1009	1.86658	0.975135	0.00238138	258.222	3.3442	258.081	3.34236	122.459	4.03649
	split73	1641.87	2.33998	3.54868	0.0712058	7465.82	150.407	62.8931	1.72366	0.97868	0.00224818	257.329	3.07786	257.185	3.07617	129.987	3.73696
	split3	1668.18	2.08002	3.60892	0.0723878	7479.4	150.514	63.9406	1.41434	0.981373	0.00201054	258.844	2.68747	258.701	2.68612	132.718	3.10333
	split8	1669.85	2.55588	2.74434	0.0551033	9822.06	198.076	61.185	1.54481	0.979033	0.00237057	259.752	3.11935	259.625	3.17602	127.33	3.40459
	split12	1721.77	2.46266	2.6666	0.053535	10422.9	210.139	59.0326	1.48744	0.979056	0.00229016	262.449	3.09952	262.325	3.09824	123.791	3.30168
	split15	1747.55	2.35022	2.34873	0.0471472	12011.1	242.24	59.7776	1.36944	0.979087	0.00231856	261.547	3.00712	261.43	3.00603	125.037	3.05462
	split23	1665.33	2.18712	2.72191	0.0546186	9904.33	199.517	61.2112	1.38109	0.981821	0.00216556	262.678	2.90595	262.551	2.90473	128.441	3.08338
3	split26	1649.39	2.33712	2.61392	0.0524735	10226.8	206.237	62.7205	1.51727	0.982978	0.00234618	262.023	3.13613	261.898	3.13481	131.366	3.38379
	split38	1622.27	2.13825	3.73169	0.0748553	7027.45	141.416	60.634	1.4628	0.980426	0.00203468	261.907	2.84201	261.759	2.84046	126.946	3.22728
	split41	1626.47	2.2063	2.58637	0.0519254	10197.1	206.08	64.4012	1.41919	0.983459	0.0026397	260.455	3.26599	260.331	3.26462	134.291	3.20765
	split54	1633.53	2.3983	2.58212	0.0518517	10210	205.814	63.0691	1.66534	0.978831	0.00224434	257.275	3.02668	257.15	3.02541	130.338	3.61708
	split66	1608.13	2.42693	2.65472	0.0533058	9784.09	197.32	62.8712	1.57744	0.979608	0.00236083	258.308	3.08362	258.181	3.08228	130.307	3.4604
	split73	1648.65	2.39499	2.81283	0.0564715	9437.5	190.15	61.4513	1.50072	0.976579	0.00218508	256.894	2.85341	256.765	2.85299	126.857	3.26199
Note
δ234U = ([234U/238U]activity – 1) × 1000.
δ234Uinitial was calculated based on 230Th age (T), i.e., δ234Uinitial = δ234Umeasured × eλ234 × T.
Corrected 230Th ages assume the initial 230Th/232Th atomic ratio of (4.4 ±2.2) × 10-6. Those are the values for a material at secular equilibrium, with the bulk earth 232Th/238U value of 3.8. The errors are arbitrarily assumed to be 50%.
B.P. stands for “Before Present” where the “Present” is defined as the year 1950 A.D.

## Sheet: Table S3
Table S3. The stability test for PXCG-1 gypsum RM at IGGCAS. The error is 2σ error.
Test	Sample	238U		232Th		230Th / 232Th		δ234U		230Th / 238U		230Th Age (ka)		230Th Age (ka BP)		δ234UInitial
Time	Number	(ng g-1)		(ng g-1)		(atomic x10-6)		(measured)		(activity)		(uncorrected)		(corrected)		(corrected)
	split12	1809.54	2.98345	1.18669	0.0241838	14395.9	294.445	227.963	2.20961	0.572586	0.00137274	66.9132	0.278285	66.8214	0.27852	275.328	2.67747
1	split33	1807.62	3.52691	1.17938	0.0238919	14513.2	295.154	229.659	1.92464	0.574308	0.00152094	67.051	0.284257	66.9594	0.284483	277.484	2.33609
	split47	1874.27	3.32458	1.28858	0.0293627	13832.3	316.421	232.561	2.02431	0.576777	0.00154697	67.2128	0.291756	67.1192	0.292029	281.118	2.45791
	split64	1852.4	2.97553	1.37933	0.027761	12784.1	258.382	231.342	1.76156	0.57735	0.00141428	67.3983	0.263809	67.304	0.264152	279.79	2.14066
	split12	1862.43	2.31766	1.27795	0.0257851	13709.8	277.478	228.566	1.584	0.570558	0.00115092	66.546	0.219735	66.4534	0.220109	275.77	1.91879
2	split33	1860.22	2.15695	1.31219	0.0265386	13392.4	271.782	226.838	1.59915	0.57296	0.00116564	67.0613	0.223883	66.9681	0.224273	274.083	1.93999
	split47	1757.11	2.00235	1.20705	0.0244563	13720	278.924	229.429	1.61678	0.571632	0.00115393	66.6474	0.221462	66.5547	0.221834	276.89	1.95893
	split64	1828.22	2.10134	1.29746	0.0262685	13369.2	271.568	227.5	1.62355	0.575445	0.00115545	67.4025	0.224481	67.3092	0.224874	275.147	1.97134
	split12	1851.44	2.84613	1.01146	0.0203474	17266.8	348.811	230.912	1.78703	0.572119	0.00137394	66.6078	0.25716	66.5191	0.257336	278.652	2.16596
3	split33	1862.21	2.64169	1.23352	0.0247967	14282.8	288.273	229.142	1.60621	0.573804	0.00131729	67.0124	0.243668	66.9204	0.243967	276.829	1.94982
	split47	1779.18	2.6037	1.19372	0.0240096	14083.2	284.463	228.993	1.77237	0.573086	0.00135523	66.9107	0.25547	66.8185	0.255757	276.57	2.1499
	split64	1726.37	2.23657	1.13223	0.022767	14446.2	291.596	231.159	1.6192	0.574629	0.00125557	66.9832	0.235426	66.8915	0.235733	279.243	1.96482
	split12	1854.23	2.78329	1.10692	0.0257598	15763.3	368.014	231.861	1.98531	0.570738	0.00136702	66.3172	0.263821	66.2271	0.264076	279.567	2.40284
4	split33	1862.37	2.70573	1.34005	0.0279766	13167.3	276.152	229.818	1.75233	0.574626	0.00141899	67.0886	0.263463	66.995	0.2638	277.704	2.12752
	split47	1775.5	2.33532	1.25617	0.0349365	13381.3	373.155	231.651	1.83343	0.574197	0.00139134	66.8764	0.262107	66.7832	0.262694	279.753	2.2238
	split64	1725.99	2.38225	1.0793	0.026174	15172	369.225	230.447	1.98464	0.575412	0.0014139	67.1629	0.273013	67.072	0.273233	278.526	2.40829
Note
δ234U = ([234U/238U]activity – 1) × 1000.
δ234Uinitial was calculated based on 230Th age (T), i.e., δ234Uinitial = δ234Umeasured × eλ234 × T.
Corrected 230Th ages assume the initial 230Th/232Th atomic ratio of (4.4 ±2.2) × 10-6. Those are the values for a material at secular equilibrium, with the bulk earth 232Th/238U value of 3.8. The errors are arbitrarily assumed to be 50%.
B.P. stands for “Before Present” where the “Present” is defined as the year 1950 A.D.

## Sheet: Table S4
Table S4. The stability test for PXCG-2 gypsum RM at IGGCAS. The error is 2σ error.
Test	Sample	238U		232Th		230Th / 232Th		δ234U		230Th / 238U		230Th Age (ka)		230Th Age (ka BP)		δ234UInitial
Time	Number	(ng g-1)		(ng g-1)		(atomic x10-6)		(measured)		(activity)		(uncorrected)		(corrected)		(corrected)
	split12	1665.05	2.59787	3.03264	0.0609647	8869.01	178.831	60.7777	1.39106	0.979721	0.00216388	260.978	2.86825	260.846	2.86698	126.919	3.0811
1	split33	1674.5	2.57223	3.00316	0.0603699	8987.63	181.524	60.0609	1.24852	0.977626	0.00243132	259.652	2.97225	259.52	2.97095	124.954	2.80088
	split47	1654.68	2.10302	3.41765	0.0686221	7829.61	157.627	61.8966	1.55944	0.98082	0.00190334	260.763	2.78205	260.622	2.78068	129.174	3.40871
	split64	1626.65	2.6833	3.10496	0.07291	8454.05	179.93	62.266	1.66265	0.978727	0.00258982	258.126	3.33145	257.987	3.3297	128.982	3.65127
	split12	1650.43	1.93088	3.29751	0.066214	8120.15	163.523	62.3069	1.52778	0.983983	0.00189275	263.623	2.82006	263.485	2.8187	131.085	3.37921
2	split33	1682.96	1.91105	3.39175	0.0680701	8013.4	161.197	61.8031	1.44587	0.979491	0.00174202	259.478	2.53044	259.339	2.52928	128.513	3.1434
	split47	1677.39	2.05514	3.24931	0.0652343	8326.52	167.6	59.8083	1.55893	0.978263	0.00185459	260.634	2.75105	260.497	2.74975	124.772	3.39335
	split64	1626.72	2.25788	3.51999	0.0706868	7464.75	150.521	59.5516	1.71749	0.979666	0.00224519	262.451	3.24418	262.307	3.24238	124.873	3.77837
	split12	1668.06	2.06561	3.09736	0.0620881	8689.9	174.821	61.7261	1.47061	0.978653	0.002061	258.699	2.77835	258.565	2.77706	128.073	3.21221
3	split33	1667.77	2.33893	3.17938	0.0637557	8485.71	170.829	63.0022	1.63172	0.981132	0.00222001	259.73	3.0525	259.595	3.05099	131.101	3.57822
	split47	1656.33	2.19834	3.21354	0.0644318	8309.14	167.261	59.9777	1.62537	0.97775	0.00217771	259.885	3.03536	259.748	3.03383	124.861	3.5486
	split64	1636.7	2.07164	3.07293	0.0616078	8629.8	173.65	61.2791	1.44823	0.982692	0.00209816	263.532	2.92377	263.397	2.92237	128.891	3.22634
	split12	1667.44	2.16824	3.12114	0.0625704	8614.09	173.284	61.3705	1.60418	0.977927	0.00206625	258.377	2.88122	258.242	2.87983	127.219	3.48249
4	split33	1669.68	2.06988	3.18816	0.0639137	8462.84	170.099	62.1883	1.54335	0.980071	0.00186903	259.614	2.70987	259.478	2.70858	129.365	3.35937
	split47	1659.35	2.01503	3.23681	0.0648803	8277.86	166.387	60.0335	1.50859	0.979338	0.0018861	261.496	2.7535	261.359	2.75216	125.547	3.30219
	split64	1639.11	1.92091	3.09814	0.0620949	8564.61	172.205	60.9701	1.45458	0.981825	0.00194949	262.986	2.7929	262.851	2.79158	128.044	3.21707
Note
δ234U = ([234U/238U]activity – 1) × 1000.
δ234Uinitial was calculated based on 230Th age (T), i.e., δ234Uinitial = δ234Umeasured × eλ234 × T.
Corrected 230Th ages assume the initial 230Th/232Th atomic ratio of (4.4 ±2.2) × 10-6. Those are the values for a material at secular equilibrium, with the bulk earth 232Th/238U value of 3.8. The errors are arbitrarily assumed to be 50%.
B.P. stands for “Before Present” where the “Present” is defined as the year 1950 A.D.

## Sheet: Table S5
Table S5. The 230Th dating results for PXCG-1 gypsum RM in three different laboratories. The error is 2σ error.
Lab	Sample	238U		232Th		230Th / 232Th		δ234U		230Th / 238U		230Th Age (ka)		230Th Age (ka BP)		δ234UInitial
	Number	(ng g-1)		(ng g-1)		(atomic x10-6)		(measured)		(activity)		(uncorrected)		(corrected)		(corrected)
	split3	1831.69	2.62587	1.42385	0.028828	12193.5	247.953	229.294	1.85148	0.574878	0.00136537	67.17	0.261019	67.0765	0.261341	277.135	2.2471
	split8	1810.89	2.46748	1.29433	0.0262525	13244.4	269.876	227.886	1.73841	0.574143	0.00136831	67.1654	0.256805	67.0736	0.257083	275.43	2.11058
	split12	1859.56	2.58106	1.28146	0.025987	13719.3	279.614	228.263	1.67204	0.573406	0.00141215	67.0189	0.259419	66.9277	0.259672	275.774	2.03014
IGGCAS	split23	1859.74	2.7127	1.23867	0.0251516	14203.9	290.005	228.057	1.84148	0.57378	0.00148317	67.0944	0.276272	67.0038	0.276484	275.583	2.2356
	split38	1821.54	2.52225	1.2317	0.0250161	14030.5	286.594	227.854	1.78607	0.575401	0.00148407	67.3672	0.275032	67.2764	0.275255	275.55	2.17053
	split54	1793.33	2.30027	1.37811	0.0279037	12328.7	250.959	229.461	1.7068	0.57461	0.00141074	67.1144	0.260638	67.0212	0.260958	277.294	2.07267
	split66	1819.57	2.70595	1.24015	0.0251423	13856	282.406	230.091	1.70585	0.572768	0.00147131	66.7743	0.267613	66.6833	0.267848	277.79	2.07015
	split73	1806.35	2.62379	1.4622	0.0295795	11710.8	238.077	229.336	2.03417	0.574944	0.00142941	67.177	0.277619	67.0827	0.277941	277.191	2.46822
	split3	1790.04	2.07602	1.29296	0.0263129	13093.6	266.755	229.714	1.42016	0.573611	0.000859815	66.9367	0.175872	66.8472	0.176212	277.463	1.7209
	split8	1835.41	1.97102	1.27051	0.0258742	13642.7	278.45	229.539	1.35474	0.572765	0.000989877	66.8171	0.188816	66.7282	0.189104	277.159	1.64247
	split12	1867.51	2.09102	1.17368	0.0239249	15031.8	306.891	229.949	1.40868	0.572971	0.0009141	66.8172	0.181676	66.7298	0.18192	277.655	1.7069
XJTU	split23	1849.54	2.08467	1.22913	0.0250723	14221.7	290.727	229.521	1.48967	0.573219	0.00100474	66.89	0.197173	66.8018	0.197421	277.195	1.80571
	split38	1835.52	2.23556	1.25377	0.025541	13881.6	283.17	229.268	1.59596	0.575083	0.000928073	67.2044	0.193827	67.1158	0.194093	277.134	1.93512
	split54	1872.13	2.01399	1.20931	0.0246833	14641.8	299.358	228.94	1.50427	0.573629	0.000918085	67.0006	0.18748	66.9128	0.187728	276.58	1.82319
	split66	1864.03	2.12378	1.26296	0.0257457	13961.6	285.272	228.4	1.48902	0.573727	0.00103098	67.0589	0.201125	66.9704	0.201378	275.971	1.80598
	split73	1838.16	2.00614	1.22944	0.0250602	14181.7	289.826	228.432	1.41569	0.575292	0.0010554	67.3039	0.20157	67.2155	0.201817	276.201	1.71895
	split3	1873.09	0.272758	1.00242	0.032772	17723	579.265	230.071	0.515414	0.575237	0.000605322	67.0921	0.104028	67.0799	0.104203	278.019	0.628174
	split8	1960.32	0.277828	1.09518	0.0332375	16950.3	514.925	229.917	0.521075	0.574346	0.000730264	66.9636	0.12228	66.9509	0.122425	277.733	0.636714
	split12	1938.28	0.286274	0.991551	0.0334639	18441.2	623.052	231.341	0.568078	0.572159	0.000711061	66.5075	0.120158	66.4958	0.120289	279.094	0.691857
NNU	split23	1819.53	0.267497	1.12791	0.0329485	15330.6	448.222	229.864	0.55235	0.576382	0.00066079	67.2896	0.11333	67.2754	0.113528	277.922	0.673742
	split38	1871.36	0.345417	1.06808	0.0345733	16526.9	535.558	230.084	0.53444	0.57211	0.000724285	66.5982	0.121428	66.5852	0.121585	277.648	0.651919
	split54	1850.63	0.240905	1.08507	0.0346864	16132.1	515.561	229.95	0.486595	0.573674	0.000624397	66.8551	0.105597	66.8418	0.10579	277.687	0.59343
	split66	1819.91	0.238003	1.24731	0.0330656	13835.2	366.818	228.589	0.448212	0.575105	0.00062716	67.189	0.105537	67.1733	0.105795	276.301	0.54801
	split73	1770.64	0.251551	1.04874	0.0345994	15992	527.864	229.118	0.484476	0.574465	0.000648096	67.0456	0.109371	67.0321	0.109567	276.83	0.591591
Note
δ234U = ([234U/238U]activity – 1) × 1000.
δ234Uinitial was calculated based on 230Th age (T), i.e., δ234Uinitial = δ234Umeasured × eλ234 × T.
Corrected 230Th ages assume the initial 230Th/232Th atomic ratio of (4.4 ±2.2) × 10-6. Those are the values for a material at secular equilibrium, with the bulk earth 232Th/238U value of 3.8. The errors are arbitrarily assumed to be 50%.
B.P. stands for “Before Present” where the “Present” is defined as the year 1950 A.D.
The red font data was the outliers, which were detected and removed by the Grubbs method and the Dixon method.

## Sheet: Table S6
Table S6. The 230Th dating results for PXCG-2 gypsum RM in three different laboratories. The error is 2σ error.
Lab	Sample	238U		232Th		230Th / 232Th		δ234U		230Th / 238U		230Th Age (ka)		230Th Age (ka BP)		δ234UInitial
	Number	(ng g-1)		(ng g-1)		(atomic x10-6)		(measured)		(activity)		(uncorrected)		(corrected)		(corrected)
	split3	1627.11	2.20676	3.31958	0.066742	7925.71	159.844	63.5148	1.57898	0.98071	0.00204483	258.671	2.8412	258.531	2.83978	131.771	3.4419
	split8	1620.24	2.0909	3.3761	0.0678664	7769.61	156.655	60.321	1.58051	0.981903	0.00198823	263.895	2.95978	263.753	2.95823	127.003	3.49259
	split12	1664.27	2.15429	3.47397	0.0716167	7743.57	160.069	60.9256	1.50954	0.980341	0.00195756	261.453	2.8046	261.31	2.80319	127.395	3.31347
IGGCAS	split23	1638.59	2.11781	3.20793	0.0645013	8263.13	166.792	61.7285	1.59193	0.981146	0.00215498	261.31	3.02136	261.172	3.01986	129.023	3.50445
	split38	1604.26	2.16662	3.3114	0.0665475	7877.15	158.746	63.9057	1.76714	0.986141	0.0019933	263.927	3.11137	263.786	3.10972	134.563	3.90396
	split54	1616.47	2.17428	3.2655	0.0656319	8047.78	162.14	64.1083	1.74258	0.986033	0.00191271	263.553	3.01675	263.414	3.01519	134.848	3.84089
	split66	1591.82	2.16657	3.27622	0.0658474	7861.09	158.426	61.3002	1.77685	0.981285	0.00197488	261.992	3.064	261.85	3.06238	128.374	3.88298
	split73	1654.93	2.37578	3.19585	0.0642556	8385.32	169.024	64.2667	1.84241	0.98211	0.00199316	259.213	3.03752	259.076	3.03599	133.537	3.99563
	split3	1618.58	1.84893	3.13542	0.0638216	8323.63	169.829	63.5148	1.57898	0.98071	0.00204483	261.976	2.69139	261.852	2.69033	122.405	3.31086
	split8	1622.29	1.93921	2.79214	0.0562286	9342.65	188.477	60.321	1.58051	0.981903	0.00198823	259.595	2.62657	259.477	2.62563	120.78	3.45861
	split12	1608.89	1.74453	3.27862	0.0658735	7947.42	159.892	60.9256	1.50954	0.980341	0.00195756	262.566	2.3458	262.44	2.34491	129.373	3.0129
XJTU	split23	1601.18	1.96286	3.54574	0.0712496	7302.25	147.011	61.7285	1.59193	0.981146	0.00215498	262.342	2.74358	262.21	2.74236	126.954	3.54832
	split38	1627.16	1.66434	3.56107	0.071502	7350.69	147.757	63.9057	1.76714	0.986141	0.0019933	259.674	2.09804	259.543	2.09727	121.475	2.69929
	split54	1613.65	1.74098	3.52812	0.0709386	7377.4	148.76	64.1083	1.74258	0.986033	0.00191271	262.835	2.69519	262.704	2.69402	121.932	3.16673
	split66	1571.7	1.78124	3.35883	0.0675387	7547.4	152.06	61.3002	1.77685	0.981285	0.00197488	261.272	2.50973	261.143	2.50871	123.898	3.11572
	split73	1616.69	1.60844	3.21184	0.0645295	8135.29	163.722	64.2667	1.84241	0.98211	0.00199316	264.707	2.3633	264.584	2.36241	122.988	2.87568
	split3	1660.32	0.277894	2.80543	0.0366422	9604.18	125.826	61.5974	0.466788	0.984247	0.00106388	264.746	1.30943	264.702	1.30956	130.012	1.09615
	split8	1631.56	0.21932	2.92337	0.0374694	9008.58	115.774	60.7162	0.496363	0.978966	0.00105668	260.185	1.26823	260.139	1.26838	126.512	1.12905
	split12	1661.16	0.271285	3.01203	0.03727	8903.06	110.696	62.1844	0.524557	0.979079	0.00118199	258.517	1.37723	258.47	1.37739	128.962	1.19781
NNU	split23	1727.78	0.241656	2.68443	0.03578	10338.5	138.246	60.1574	0.459036	0.974205	0.00112423	255.937	1.26318	255.896	1.26328	123.856	1.04315
	split38	1644.51	0.25006	3.64315	0.0376196	7259.08	75.3656	60.881	0.542757	0.975334	0.00106352	256.23	1.2552	256.173	1.25546	125.443	1.20341
	split54	1632.48	0.245804	3.13113	0.0368974	8414.31	99.4242	61.3291	0.500514	0.978837	0.00100925	259.301	1.21646	259.251	1.21671	127.469	1.12862
	split66	1681.33	0.296192	2.95371	0.0363545	10139	125.14	58.0306	0.473242	0.972247	0.00102113	256.456	1.18797	256.415	1.18814	119.652	1.05503
	split73	1677.17	0.269657	2.73439	0.0371033	9932.76	135.317	62.0918	0.645089	0.98216	0.00113142	261.866	1.45027	261.824	1.45036	129.995	1.45158
Note
δ234U = ([234U/238U]activity – 1) × 1000.
δ234Uinitial was calculated based on 230Th age (T), i.e., δ234Uinitial = δ234Umeasured × eλ234 × T.
Corrected 230Th ages assume the initial 230Th/232Th atomic ratio of (4.4 ±2.2) × 10-6. Those are the values for a material at secular equilibrium, with the bulk earth 232Th/238U value of 3.8. The errors are arbitrarily assumed to be 50%.
B.P. stands for “Before Present” where the “Present” is defined as the year 1950 A.D.
The red font data was the outliers, which were detected and removed by the Grubbs method and the Dixon method.

## Sheet: Table S7
Table S7 Results of characterization in three laboratories for PXCG-1 gypsum RM samples
	238U	232Th	230Th / 232Th	δ234U	230Th / 238U	230Th Age (ka)	230Th Age (ka BP)	δ234UInitial
	(ng g-1)	(ng g-1)	(atomic x10-6)	(measured)	(activity)	(uncorrected)	(corrected)	(corrected)
N	3	3	3	3	3	3	3	3
X	1844.21	1.2125	14536.5	229.292	0.57407	67.0188	66.9702	277.012
S	18.7501	0.12311	1650.36	0.54333	0.00025	0.08465	0.08329	0.59108
2S	37.5003	0.24622	3300.73	1.08666	0.0005	0.1693	0.16658	1.18216
RSD%	1.02	10.15	11.35	0.24	0.04	0.13	0.12	0.21
Uchar	10.8254	0.07108	952.838	0.31369	0.00014	0.04887	0.04809	0.34126
Note
X = mean values; S = Standard deviations; RSD % = relative standard deviations;

## Sheet: Table S8
Table S7 Results of characterization in three laboratories for PXCG-2 gypsum RM samples
	238U	232Th	230Th / 232Th	δ234U	230Th / 238U	230Th Age (ka)	230Th Age (ka BP)	δ234UInitial
	(ng g-1)	(ng g-1)	(atomic x10-6)	(measured)	(activity)	(uncorrected)	(corrected)	(corrected)
N	3	3	3	3	3	3	3	3
X	1635.73	3.16607	8366.65	60.9661	0.97971	260.926	260.821	127.017
S	25.5747	0.24288	722.464	1.71622	0.00237	1.53492	1.48473	3.56569
2S	51.1493	0.48576	1444.93	3.43244	0.00474	3.06984	2.96946	7.13138
RSD%	1.56	7.67	8.64	2.82	0.24	0.59	0.57	2.81
Uchar	14.7655	0.14023	417.115	0.99086	0.00137	0.88619	0.85721	2.05865
Note
X = mean values; S = Standard deviations; RSD % = relative standard deviations;
